# Supplementary material for: Effect of Phytoplasma Associated with Sesame Phyllody on Ultrastructural Modification, Physio-Biochemical Traits, Productivity and Oil Quality
Source: MDPI journal article supplement (doi:10.3390/plants11040477), 2022-02-10
Supplement: s1 [file s1]

**Table S1.** Identity the sequence of phytoplasma under study and other available on the GenBank.

| Accession number on GenBank | Country            | 16Sr group and subgroup | Sequence homology |
|-----------------------------|--------------------|-------------------------|-------------------|
| MW945416.1                  | Egypt (This study) |                         | 100.0%            |
| MH011394.1                  | Egypt              | II                      | 99.7%             |
| L33765.1                    | USA                | II                      | 99.7%             |
| EF666051.1                  | Oman               | XXIX                    | 91.5%             |
| DQ174122.1                  | USA                | XII                     | 90.6%             |
| MH043107.1                  | Egypt              | I                       | 90.4%             |
| KC412029.1                  | Argentina          | III                     | 92.7%             |
| AF248959.1                  | USA                | XII                     | 89.8%             |
| AY265213.1                  | USA                | I-E                     | 90.4%             |
| AF498307.1                  | USA                | IV                      | 91.8%             |
| AY197655.1                  | USA                | V                       | 90.5%             |
| AF092209.1                  | USA                | VII                     | 91.0%             |
| AF248956.1                  | USA                | VIII                    | 91.4%             |
| AJ542541.1                  | Germany            | X                       | 90.3%             |
| AJ550984.1                  | Italy              | XIV                     | 91.5%             |
| Y14175.1                    | UK                 | XXII-A                  | 92.1%             |
| JQ044393.1_                 | USA_               | III                     | 92.8%             |
| AY083605.1                  | Australia          | XII                     | 90.3%             |
| MT106668.1                  | China              | I                       | 90.6%             |
| L76865.1                    | USA                | XII                     | 90.4%             |
| AY197642.1                  | USA                | V-C                     | 90.4%             |
| EU498728.1                  | Malaysia           | XXXII                   | 91.2%             |
